# Supplementary material
Source: publisher figshare collection journal article supplement (https://karger.figshare.com/ndownloader/files/38041104)

Supplementary Material

Figure 1 Distribution of stroke units in Denmark

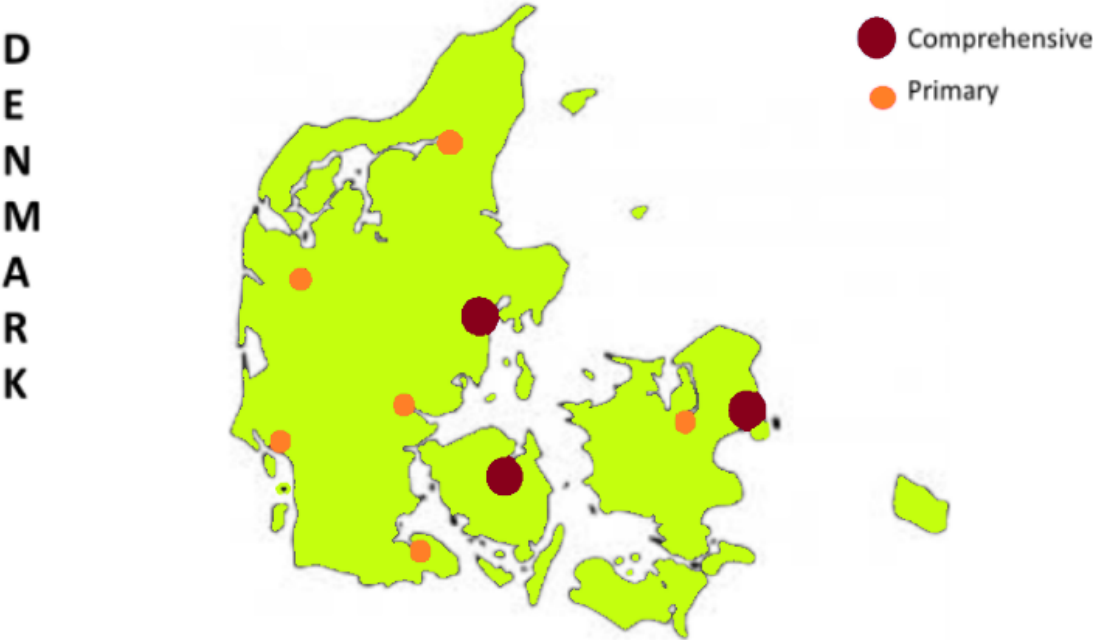

Figure 2 The distribution of patients onset-to-door time

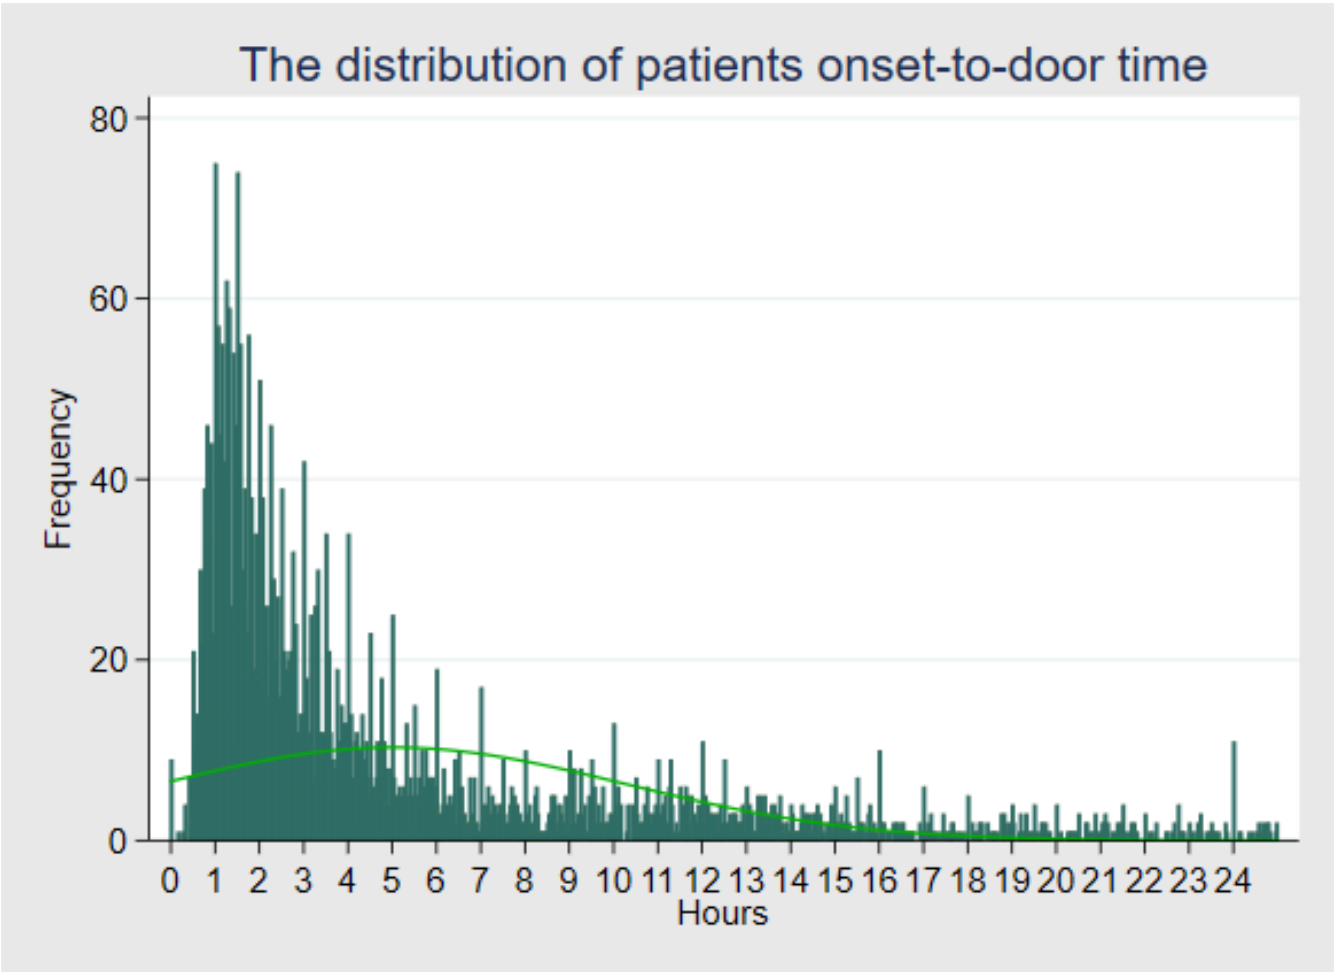

Supplement: Supplementary file 1 [file 38041104]
